# Supplementary material
Source: HighWire-hosted journal article supplement (https://erj.ersjournals.com/content/50/4/1701235)

Figure E2.

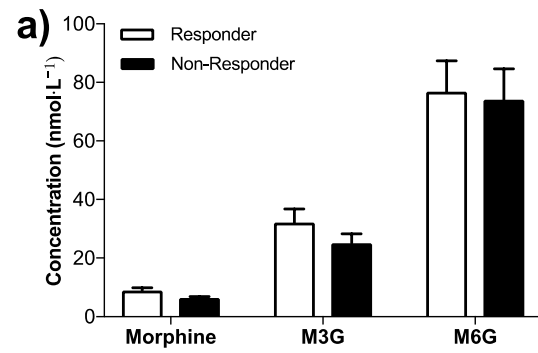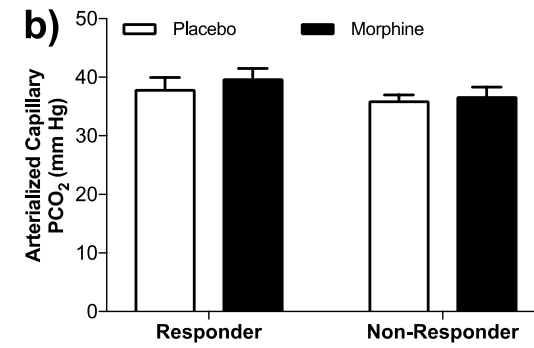

Supplement: inline-supplementary-material-3 [file inline-supplementary-material-3.pdf]
